# Supplementary material for: Cohort Removal Induces Changes in Body Temperature, Pain Sensitivity, and Anxiety-Like Behavior
Source: PubMed Central journal article supplement (PMC4891333; doi:10.3389/fnbeh.2016.00099), 2016-06-03
Supplement: Image_1.pdf [file Image_1.pdf]

### A Over 200 days old

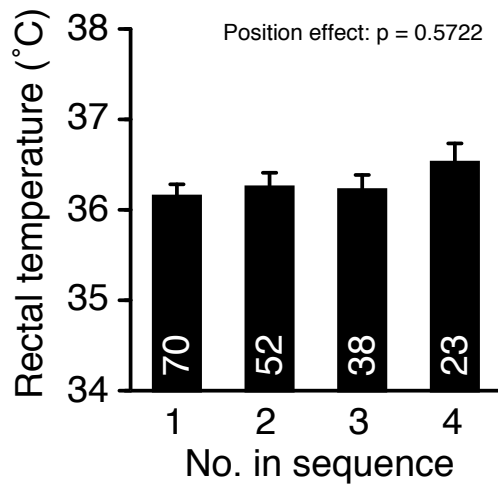

### B Less than 200 days old

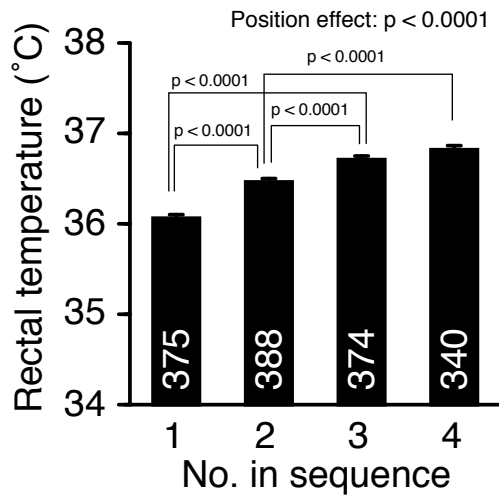

### C Female

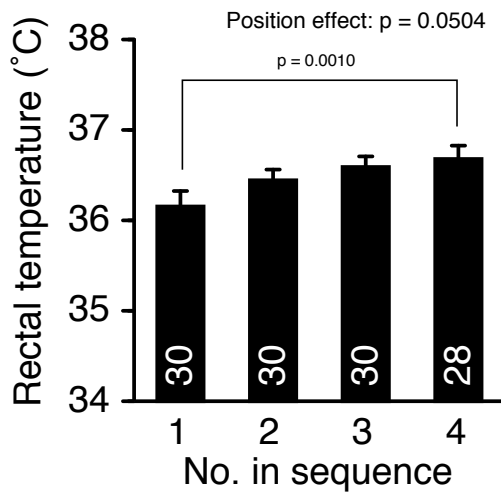

### D B6N

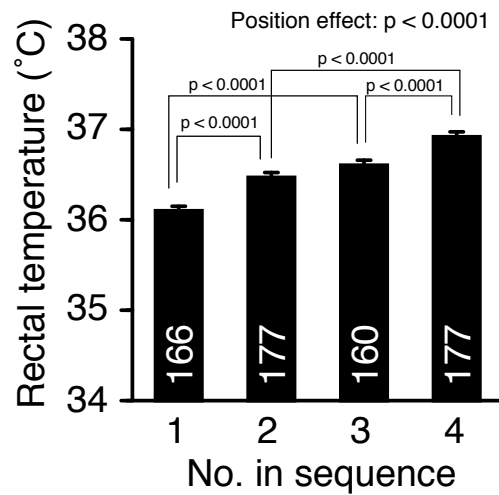

Supp Figure 1
