# Supplementary material for: Cohort Removal Induces Changes in Body Temperature, Pain Sensitivity, and Anxiety-Like Behavior
Source: PubMed Central journal article supplement (PMC4891333; doi:10.3389/fnbeh.2016.00099), 2016-06-03
Supplement: Image_2.pdf [file Image_2.pdf]

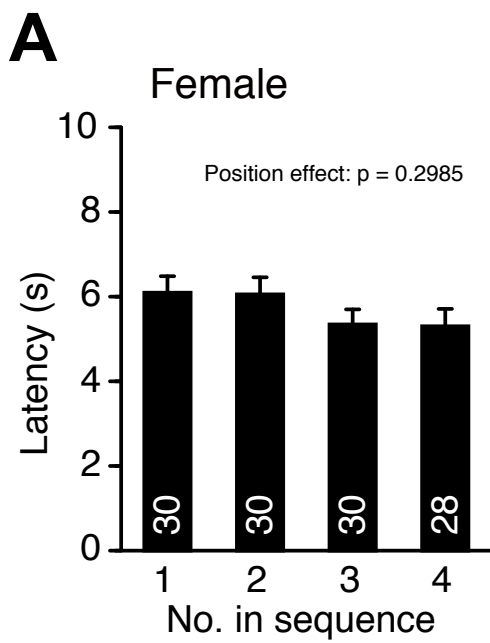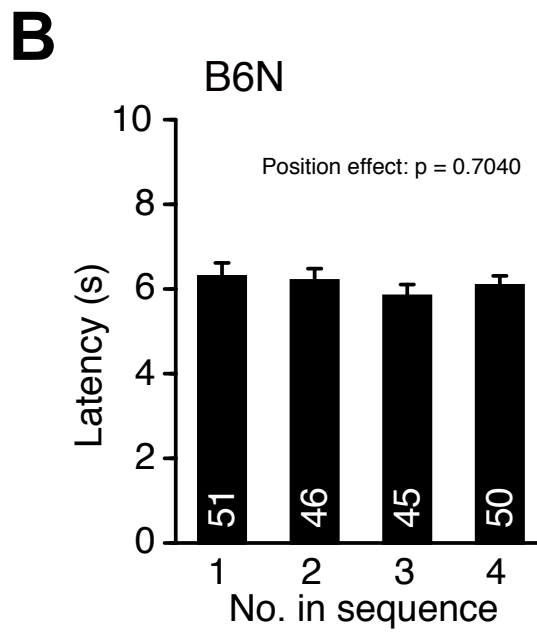

Supplementary figure 2
