# Supplementary material for: Cohort Removal Induces Changes in Body Temperature, Pain Sensitivity, and Anxiety-Like Behavior
Source: PubMed Central journal article supplement (PMC4891333; doi:10.3389/fnbeh.2016.00099), 2016-06-03

Position effect:  $p = 0.0036$

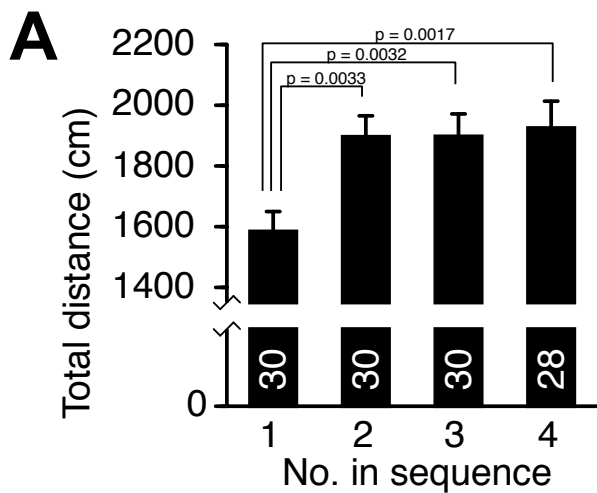

Position effect:  $p = 0.0011$

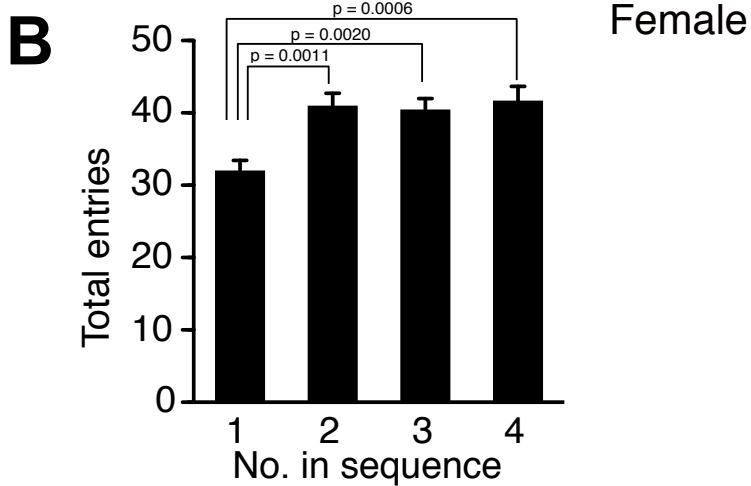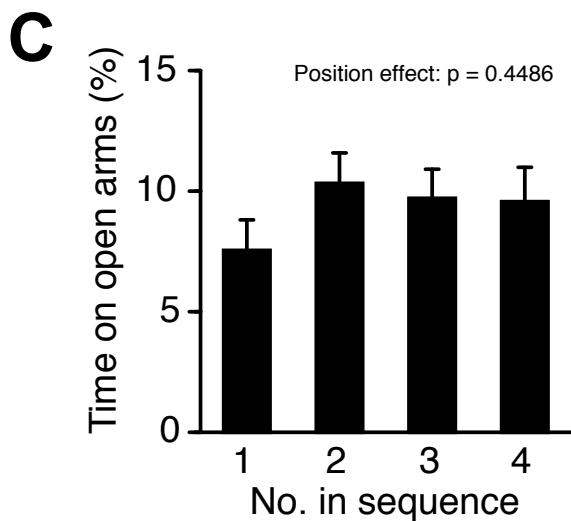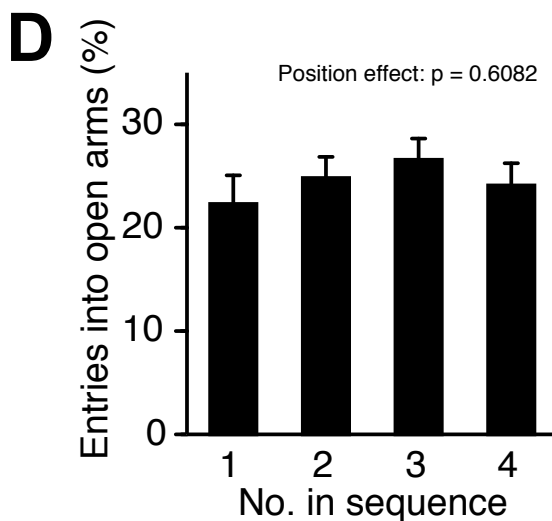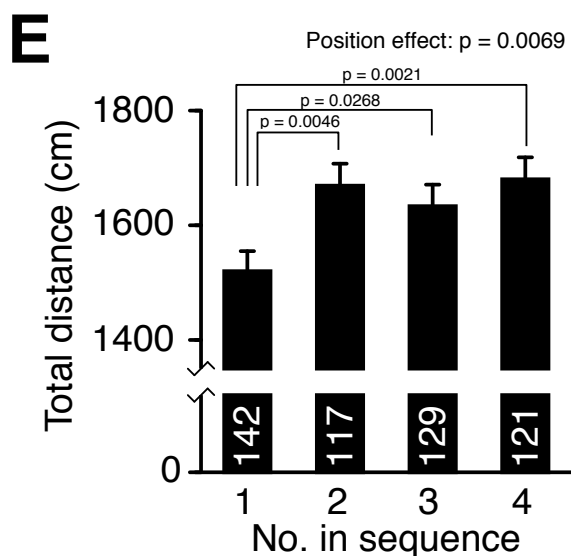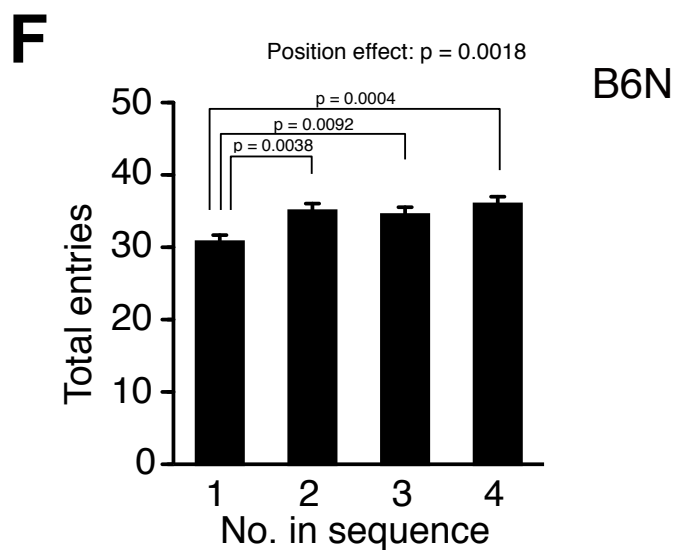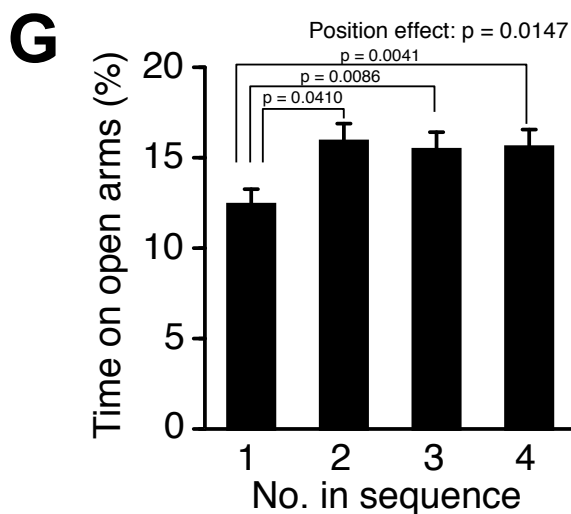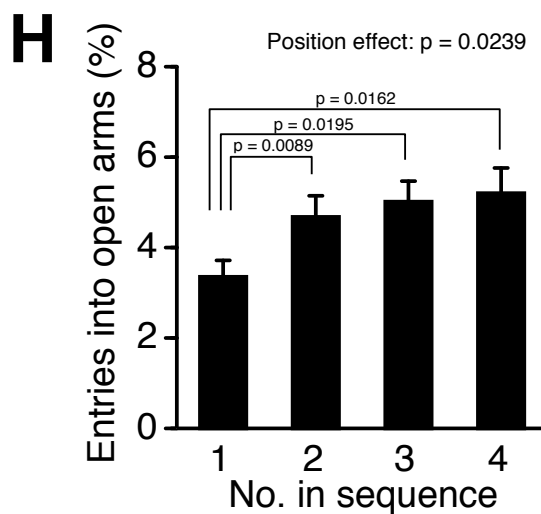

Supplement: Image_3.pdf [file Image_3.pdf]
